# Supplementary material for: Hydrogen radical enhanced atomic layer deposition of TaOx: saturation studies and methods for oxygen deficiency control
Source: Royal Society of Chemistry journal article supplement (doi:10.1039/c8tc00679b), 2018-01-01
Supplement: c8tc00679b1.pdf [file c8tc00679b1.pdf]

## Supplementary Information

For VB XPS spectra comparison 10 nm thermal-ALD  $\text{Ta}_2\text{O}_5$  films were also grown via the  $\text{Ta}(\text{OC}_2\text{H}_5)_5/\text{H}_2\text{O}$  process, at the same substrate temperature on the same substrates. VB XPS spectra of active  $\text{H}^*$  assisted ALD  $\text{TaO}_x$  and thermal-ALD  $\text{Ta}_2\text{O}_5$  films are Figure1(Supplementary Information).

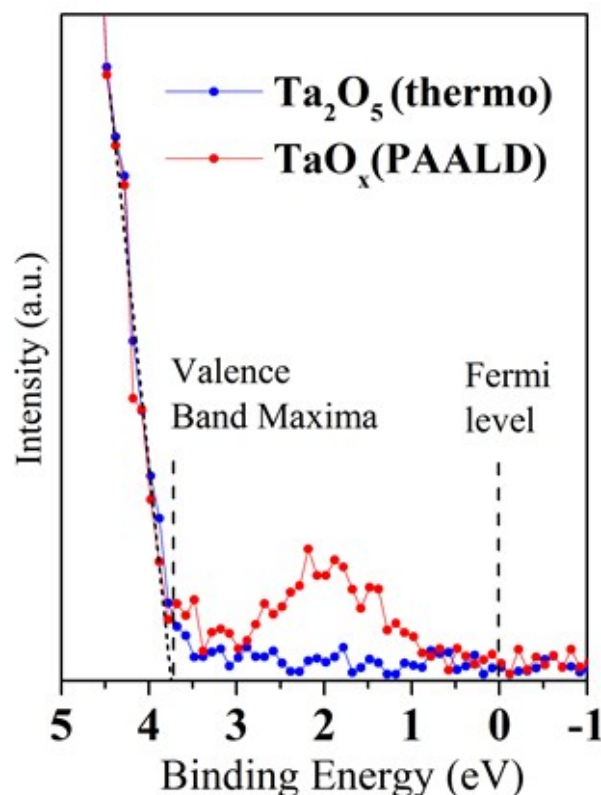

Figure 1 Valence band XPS spectra measured from 10 nm PAALD  $\text{TaO}_x$  ( $t_{pl} = 20\text{sec}$ ,  $R = 7\%$  and  $t_{pr} = 0.5\text{ sec}$  and 10 nm thermal ALD  $\text{Ta}_2\text{O}_5$  films.

It can be seen that thermal ALD  $\text{Ta}_2\text{O}_5$  film revealed no electronic states at the energies higher than VBM. In other words, there no defect states in the band gap in the stoichiometric thermal-ALD  $\text{Ta}_2\text{O}_5$  film. In contrast, a peak at  $\sim 1.8\text{ eV}$  higher than VBM is clearly distinguishable at the VB spectrum of PAALD  $\text{TaO}_x$  film.
